# Supplementary material for: Essential Medicinal Chemistry of Essential Medicines
Source: PubMed Central journal article supplement (PMC8007110; doi:10.1021/acs.jmedchem.0c00415), 2020-04-30
Supplement: jm0c00415_si_001.pdf [file jm0c00415_si_001.pdf]

## **Supporting Information**

### **The Essential Medicinal Chemistry of Essential Medicines**

**Marta Serafini,<sup>‡</sup> Sarah Cargnin,<sup>‡</sup> Alberto Massarotti, Tracey Pirali\*, and Armando A. Genazzani**

Department of Pharmaceutical Sciences, Università del Piemonte Orientale, Largo Donegani 2,  
28100 Novara, Italy

#### **Table of contents**

- p. S2      The drug–target (DT) network of all approved drugs.
- p. S4      The drug–target (DT) network of EMs.
- p. S6      Distribution of chiral centers in the EMs.
- p. S7      Properties of cutaneous EMs.

p. S8          Classification of EMs.

p. S26         References.

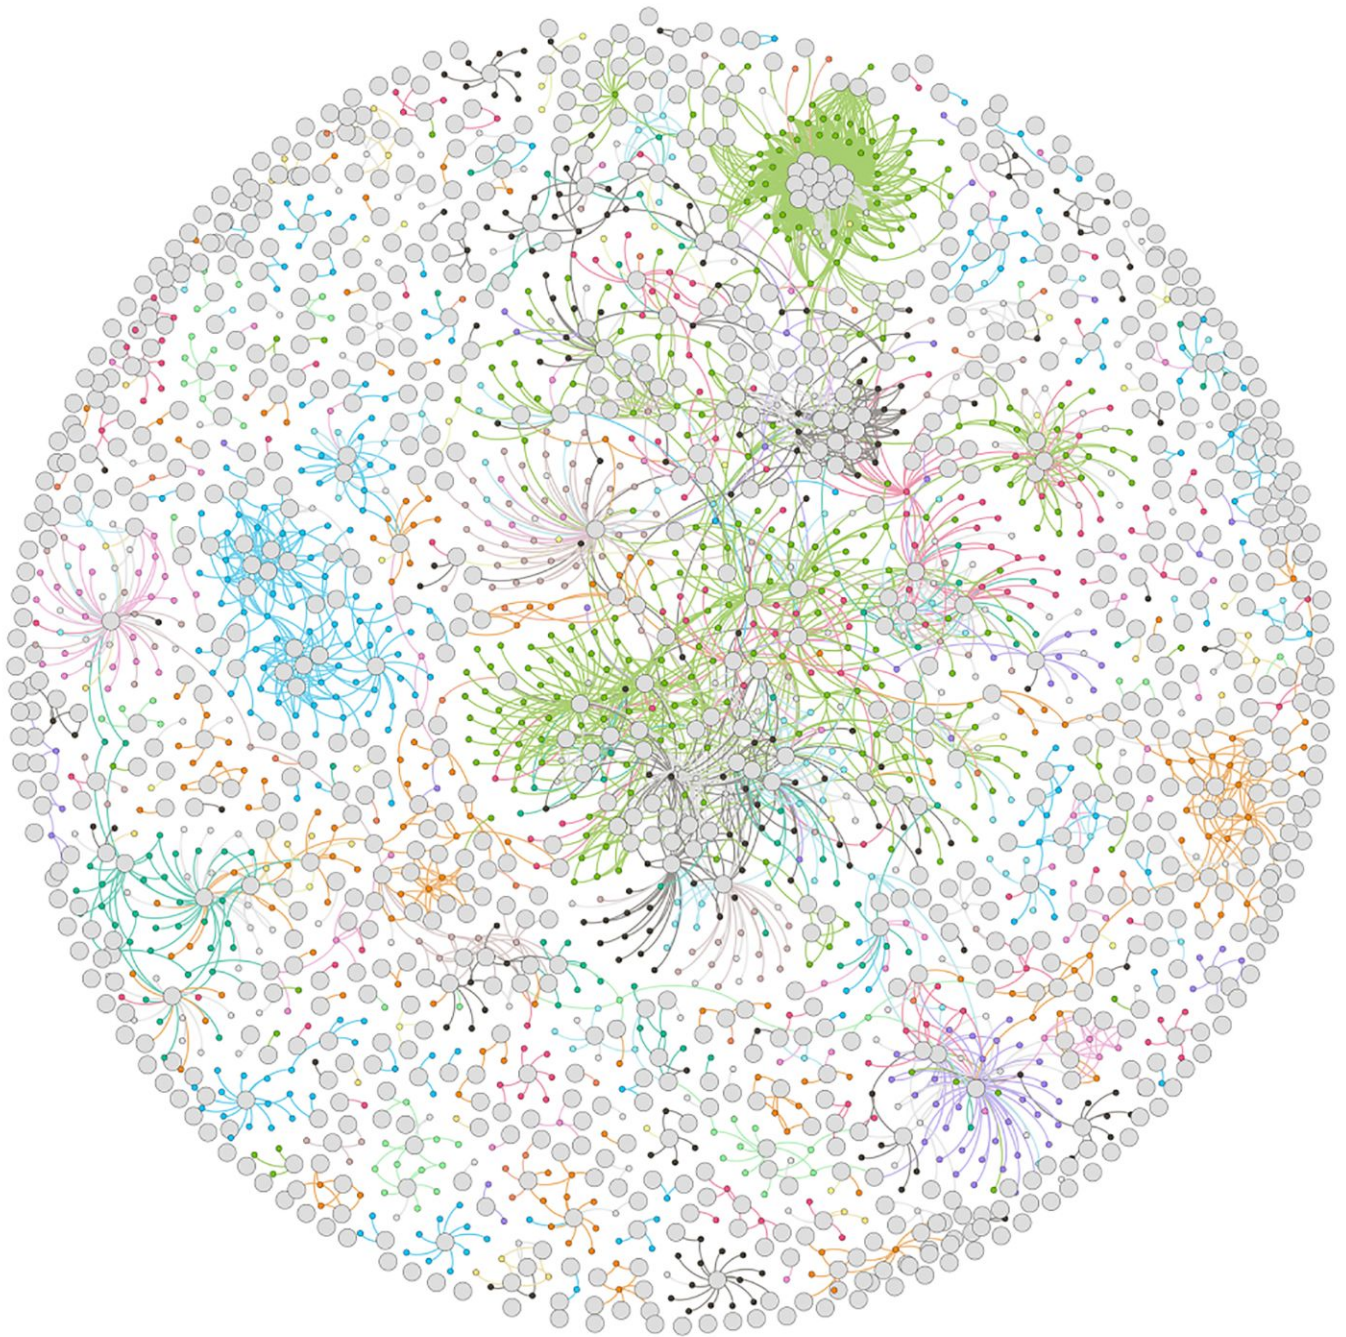

ATC code: A B C D G H J L M N P R S V

**Figure S1.** The drug–target (DT) network of all approved drugs. The DT network is generated by using the known associations between drugs and targets extracted from the DrugBank database.<sup>1</sup> As of March 2, 2020, DrugBank (version 5.1.5, released 2020-01-03) includes 2635 approved small molecule drugs and 1367 approved biologics. Additionally, 1148 non-redundant proteins (*i.e.* drug target/enzyme/transporter/carrier) sequences are linked to these drug entries. Small and big circles correspond to drugs and target proteins, respectively. A link is placed between a drug node and a target node if the protein is a known target of that drug. Drug nodes and connecting links are colored according to the ATC code of the drug.



**Figure S2.** The drug–target (DT) network of EMs. The DT network is generated by using the known associations between drugs and targets extracted from the DrugBank database.<sup>1</sup> As of March 2, 2020, DrugBank (version 5.1.5, released 2020-01-03) includes 2635 approved small molecule drugs and 1367 approved biologics. Additionally, 1148 non-redundant proteins (*i.e.* drug target/enzyme/transporter/carrier) sequences are linked to these drug entries. Small and big circles correspond to drugs and target proteins, respectively. The labels correspond to DrugBank and Uniprot codes, respectively. A link is placed between a drug node and a target node if the protein is a known target of that drug. Drug nodes and connecting links are colored according to the ATC code of the drug.

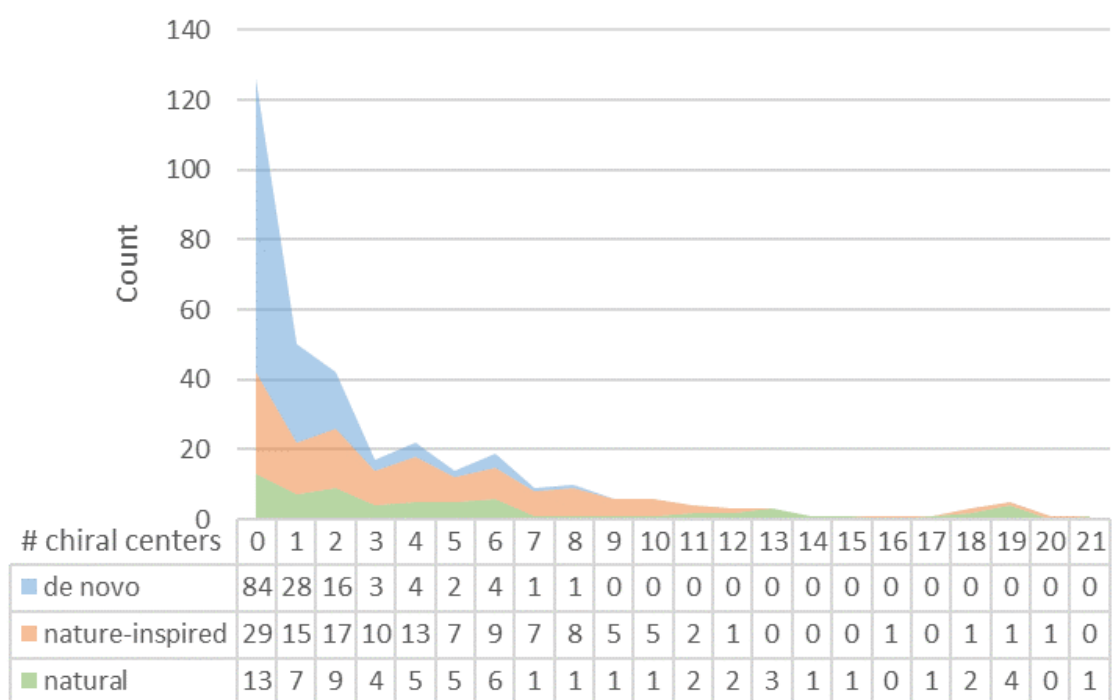

**Figure S3.** Distribution of chiral centers in de novo, Nature-inspired and natural drugs.

**Table S1.** Properties of cutaneous EMs.

| <b>Cutaneous EM</b>    | <b>MW, Da</b> | <b>clogP</b> | <b>Melting point, °C</b> |
|------------------------|---------------|--------------|--------------------------|
| aciclovir              | 225.2         | -0.95        | 256                      |
| benzoyl peroxide       | 242.23        | 2.75         | 103-106                  |
| benzyl benzoate        | 212.24        | 3.43         | 21                       |
| betamethasone valerate | 392.46        | 3.78         | 232                      |
| fluorouracil           | 130.08        | -0.58        | 282-283                  |
| hydrocortisone acetate | 404.5         | 2.31         | 220                      |
| lidocaine              | 235.35        | 1.81         | 68.5                     |
| miconazole             | 416.13        | 5.86         | 170.5                    |
| mupirocin              | 499.61        | 2.25         | 77-78                    |
| permethrin             | 391.29        | 6.24         | 34                       |
| salicylic acid         | 137.11        | 1.96         | 158                      |
| terbinafine            | 292.44        | 5.51         | >212                     |
| urea                   | 60.06         | -1.80        | 132.7                    |

**Abbreviations:** clogP, calculated logP; clogP were extracted using DrugBank<sup>1</sup> or ChemSpider<sup>2</sup> databases.



**Table S2.** Salient features and classification of EMs reported in the 21st EML.

| EM NAME                 | DRUGBANK ID CODE | CLASSIFICATION    |             |                 | ATC CODE/S                                                                                                                                                                                           | FDA year of approval* |
|-------------------------|------------------|-------------------|-------------|-----------------|------------------------------------------------------------------------------------------------------------------------------------------------------------------------------------------------------|-----------------------|
|                         |                  | LEVEL A           | LEVEL B     | LEVEL C         |                                                                                                                                                                                                      |                       |
| abacavir                | DB01048          | molecular entity  | organic     | Nature-inspired | J05AR04; J05AR13; J05AF06; J05AR02                                                                                                                                                                   | 1998                  |
| abiraterone             | DB05812          | molecular entity  | organic     | Nature-inspired | L02BX03                                                                                                                                                                                              | 2011                  |
| acetazolamide           | DB00819          | molecular entity  | organic     | de novo         | S01EC01                                                                                                                                                                                              | 1953                  |
| acetic acid             | DB03166          | molecular entity  | organic     | natural         | G01AD02; S02AA10                                                                                                                                                                                     | 1960                  |
| acetylcysteine          | DB06151          | molecular entity  | organic     | Nature-inspired | V03AB23; S01XA08; R05CB01                                                                                                                                                                            | 1963                  |
| acetylsalicylic acid    | DB00945          | molecular entity  | organic     | Nature-inspired | A01AD05; N02BA71; C10BX12; C10BX02; C10BX08; N02BA01; B01AC56; M01BA03; C10BX06; N02BA51; C10BX04; C10BX05; C10BX01; B01AC06                                                                         | 1965                  |
| aciclovir               | DB00787          | molecular entity  | organic     | Nature-inspired | S01AD03; J05AB01; D06BB53; D06BB03                                                                                                                                                                   | 1982                  |
| adalimumab              | DB00051          | biological entity | proteins    |                 | L04AB04                                                                                                                                                                                              |                       |
| albendazole             | DB00518          | molecular entity  | organic     | de novo         | P02CA03                                                                                                                                                                                              | 1996                  |
| alcohol based hand rub  |                  | others            | mixtures    |                 |                                                                                                                                                                                                      |                       |
| allopurinol             | DB00437          | molecular entity  | organic     | Nature-inspired | M04AA51; M04AA01                                                                                                                                                                                     | 1966                  |
| all-trans retinoid acid | DB00755          | molecular entity  | organic     | natural         | L01XX14; D10AD01                                                                                                                                                                                     | 1971                  |
| alprostadil             | DB00770          | molecular entity  | organic     | natural         | G04BE01; C01EA01                                                                                                                                                                                     | 1981                  |
| alteplase               | DB00009          | biological entity | proteins    |                 | B01AD02; S01XA13                                                                                                                                                                                     |                       |
| amidotrizoate           | DB00271          | others            | diagnostics |                 | V08AA; V08AA01                                                                                                                                                                                       |                       |
| amikacin                | DB00479          | molecular entity  | organic     | Nature-inspired | D06AX12; J01RA06; J01GB06; S01AA21                                                                                                                                                                   | 1981                  |
| amiloride               | DB00594          | molecular entity  | organic     | de novo         | C03DB01                                                                                                                                                                                              | 1981                  |
| amiodarone              | DB01118          | molecular entity  | organic     | Nature-inspired | C01BD01                                                                                                                                                                                              | 1985                  |
| amitriptyline           | DB00321          | molecular entity  | organic     | de novo         | N06AA09; N06CA01                                                                                                                                                                                     | 1961                  |
| amlodipine              | DB00381          | molecular entity  | organic     | de novo         | C09BB03; C09BB07; C10BX03; C10BX07; C09DB07; C08GA02; C09DB01; C09BB04; C09DB05; C09DB02; C09DB06; C09DB04; C09BX01; C09DX03; C09XA53; C10BX11; C09XA54; C09DX01; C08CA01; C09BX03; C10BX14; C10BX09 | 1992                  |
| amodiaquine             | DB00613          | molecular entity  | organic     | Nature-inspired | P01BF03; P01BA06                                                                                                                                                                                     |                       |

| EM NAME                     | DRUGBANK ID CODE | CLASSIFICATION    |             |                 | ATC CODE/S                                                                               | FDA year of approval* |
|-----------------------------|------------------|-------------------|-------------|-----------------|------------------------------------------------------------------------------------------|-----------------------|
|                             |                  | LEVEL A           | LEVEL B     | LEVEL C         |                                                                                          |                       |
| amoxicillin                 | DB01060          | molecular entity  | organic     | Nature-inspired | A02BD07; A02BD01; A02BD06; A02BD04; J01CR02; A02BD11; A02BD05; J01CA04; A02BD10; A02BD03 | 1974                  |
| amphotericin B              | DB00681          | molecular entity  | organic     | natural         | G01AA03; J02AA01; A07AA07; A01AB04                                                       | 1966                  |
| ampicillin                  | DB00415          | molecular entity  | organic     | Nature-inspired | J01CR01; S01AA19; J01CA51; J01CA01                                                       | 1965                  |
| anastrozole                 | DB01217          | molecular entity  | organic     | de novo         | L02BG03                                                                                  | 1995                  |
| anti-D immunoglobulin       | DB11597          | biological entity | proteins    |                 | J06BB01                                                                                  |                       |
| Anti-rabies immunoglobulin  |                  | biological entity | proteins    |                 | J06BB21                                                                                  |                       |
| Anti-tetanus immunoglobulin | DB11604          | biological entity | proteins    |                 | J06BB02                                                                                  |                       |
| antivenom immunoglobulin    |                  | biological entity | proteins    |                 | J06                                                                                      |                       |
| aprepitant                  | DB00673          | molecular entity  | organic     | de novo         | A04AD12                                                                                  | 2003                  |
| arsenic trioxide            | DB01169          | molecular entity  | inorganic   |                 | L01XX27                                                                                  |                       |
| artemether                  | DB06697          | molecular entity  | organic     | Nature-inspired | P01BF01; P01BF05; P01BE02                                                                | 2009                  |
| artesunate                  | DB09274          | molecular entity  | organic     | Nature-inspired | P01BF06; P01BF04; P01BF03; P01BE03; P01BF02                                              | 2019                  |
| ascorbic acid               | DB00126          | molecular entity  | organic     | natural         | S01XA15; A11GB01; G01AD03; A11GA01                                                       | 2017                  |
| asparaginase                | DB00023          | biological entity | proteins    |                 | L01XX02                                                                                  |                       |
| atazanavir                  | DB01072          | molecular entity  | organic     | de novo         | J05AR15; J05AE08                                                                         | 2003                  |
| atracurium                  | DB00732          | molecular entity  | organic     | Nature-inspired | M03AC04                                                                                  | 1983                  |
| atropine                    | DB00572          | molecular entity  | organic     | natural         | S01FA01; A03BA01; A03CB03                                                                | 2014                  |
| avibactam                   | DB09060          | molecular entity  | organic     | de novo         |                                                                                          | 2015                  |
| azathioprine                | DB00993          | molecular entity  | organic     | Nature-inspired | L04AX01                                                                                  | 1968                  |
| azithromycin                | DB00207          | molecular entity  | organic     | Nature-inspired | S01AA26; J01RA07; J01FA10                                                                | 1991                  |
| barium sulfate              | Not Available    | others            | diagnostics |                 | V08BA02; V08BA01                                                                         |                       |
| BCG vaccine                 | DB12768          | biological entity | proteins    |                 | L03AX19                                                                                  |                       |
| beclometasone dipropionate  | DB00394          | molecular entity  | organic     | Nature-inspired | R03BA01; R03AL09; R01AD01; A07EA07; D07CC04; R03AK08; D07AC15; R03AK13                   | 1976                  |
| bedaquiline                 | DB08903          | molecular entity  | organic     | de novo         | J04AK05                                                                                  | 2012                  |
| bendamustine                | DB06769          | molecular entity  | organic     | de novo         | L01AA09                                                                                  | 2008                  |

| EM NAME                | DRUGBANK ID CODE | CLASSIFICATION    |           |                 | ATC CODE/S                                                                                                                                     | FDA year of approval* |
|------------------------|------------------|-------------------|-----------|-----------------|------------------------------------------------------------------------------------------------------------------------------------------------|-----------------------|
|                        |                  | LEVEL A           | LEVEL B   | LEVEL C         |                                                                                                                                                |                       |
| benznidazole           | DB11985          | molecular entity  | organic   | de novo         | P01CA02                                                                                                                                        | 2017                  |
| benzoyl peroxide       | DB09096          | molecular entity  | organic   | de novo         | D10AE51; D10AE01                                                                                                                               | 2018                  |
| benzyl benzoate        | DB00676          | molecular entity  | organic   | natural         | P03AX01                                                                                                                                        | 1976                  |
| benzylpenicillin       | DB01053          | molecular entity  | organic   | natural         | J01CE01; J01CE09; S01AA14                                                                                                                      | 1952                  |
| betamethasone valerate | DB00443          | molecular entity  | organic   | Nature-inspired | D07AC01; R03BA04; S03BA03; D07XC01; S01CA05; S03CA06; D07BC01; S01BA06; S01CB04; S02BA07; R01AD06; S01BB04; D07CC01; C05AA05; A07EA04; H02AB01 | 1983                  |
| bevacizumab            | DB00112          | biological entity | proteins  |                 | L01XC07                                                                                                                                        |                       |
| bicalutamide           | DB01128          | molecular entity  | organic   | de novo         | L02BB03                                                                                                                                        | 1995                  |
| biperiden              | DB00810          | molecular entity  | organic   | Nature-inspired | N04AA02                                                                                                                                        | 1959                  |
| bisoprolol             | DB00612          | molecular entity  | organic   | Nature-inspired | C09BX02; C07BB07; C07AB07; C07AB57; C07FB07                                                                                                    | 1992                  |
| bleomycin              | DB00290          | molecular entity  | organic   | natural         | L01DC01                                                                                                                                        | 1973                  |
| bortezomib             | DB00188          | molecular entity  | organic   | de novo         | L01XX32                                                                                                                                        | 2003                  |
| budesonide             | DB01222          | molecular entity  | organic   | Nature-inspired | A07EA06; R03AK07; R01AD05; R03BA02; R03AK12; D07AC09                                                                                           | 1994                  |
| bupivacaine            | DB00297          | molecular entity  | organic   | de novo         | N01BB01; N01BB51                                                                                                                               | 1972                  |
| caffeine               | DB00201          | molecular entity  | organic   | natural         | V04CG30; N06BC01; R03DA20; N06BC01                                                                                                             | 1993                  |
| calamine               |                  | others            | mixtures  |                 |                                                                                                                                                |                       |
| calcium                |                  | molecular entity  | inorganic |                 |                                                                                                                                                |                       |
| calcium folinate       | DB00650          | molecular entity  | organic   | Nature-inspired | V03AF03; V03AF06; V03AF03                                                                                                                      | 2006                  |
| calcium gluconate      | DB11126          | molecular entity  | organic   | natural         | A12AA03; D11AX03                                                                                                                               | 1990                  |
| capecitabine           | DB01101          | molecular entity  | organic   | Nature-inspired | L01BC06                                                                                                                                        | 1998                  |
| carbamazepine          | DB00564          | molecular entity  | organic   | de novo         | N03AF01                                                                                                                                        | 1968                  |
| carbetocin             | DB01282          | biological entity | proteins  |                 | H01BB03                                                                                                                                        |                       |
| carbidopa              | DB00190          | molecular entity  | organic   | Nature-inspired | N04BA                                                                                                                                          | 1975                  |
| carboplatin            | DB00958          | molecular entity  | organic   | de novo         | L01XA02                                                                                                                                        | 1989                  |
| cefalexin              | DB00567          | molecular entity  | organic   | Nature-inspired | J01DB01                                                                                                                                        | 1971                  |
| cefazolin              | DB01327          | molecular entity  | organic   | Nature-inspired | J01DB04                                                                                                                                        | 1973                  |

| EM NAME                   | DRUGBANK ID CODE | CLASSIFICATION    |           |                 | ATC CODE/S                                                                      | FDA year of approval* |
|---------------------------|------------------|-------------------|-----------|-----------------|---------------------------------------------------------------------------------|-----------------------|
|                           |                  | LEVEL A           | LEVEL B   | LEVEL C         |                                                                                 |                       |
| cefixime                  | DB00671          | molecular entity  | organic   | Nature-inspired | J01DD08                                                                         | 1989                  |
| cefotaxime                | DB00493          | molecular entity  | organic   | Nature-inspired | J01DD01; J01DD51                                                                | 1981                  |
| ceftazidime               | DB00438          | molecular entity  | organic   | Nature-inspired | J01DD02; J01DD52                                                                | 1985                  |
| ceftriaxone               | DB01212          | molecular entity  | organic   | Nature-inspired | J01DD54; J01DD04                                                                | 1984                  |
| cefuroxime                | DB01112          | molecular entity  | organic   | Nature-inspired | J01RA03; S01AA27; J01DC02                                                       | 1983                  |
| charcoal,activated        |                  | others            | mixtures  |                 |                                                                                 |                       |
| chlorambucil              | DB00291          | molecular entity  | organic   | de novo         | L01AA02                                                                         | 1957                  |
| chloramphenicol           | DB00446          | molecular entity  | organic   | natural         | D10AF03; S03AA08; D06AX02; J01BA01; S02AA01; G01AA05; S01AA01                   | 1953                  |
| chloramphenicol palmitate | DB00394          | molecular entity  | organic   | Nature-inspired | D07CC04; R03AL09; R03BA01; D07AC15; R03AK08; R03AK13; R01AD01; A07EA07          |                       |
| chloramphenicol succinate | DB07565          | molecular entity  | organic   | Nature-inspired |                                                                                 | 1959                  |
| chlorhexidine             | DB00878          | molecular entity  | organic   | de novo         | B05CA02; S02AA09; D08AC52; D08AC02; S03AA04; S01AX09; D09AA12; A01AB03; R02AA05 | 1976                  |
| chlorine base compound    |                  | others            | mixtures  |                 |                                                                                 |                       |
| chloroquine               | DB00608          | molecular entity  | organic   | Nature-inspired | P01BA01                                                                         | 1949                  |
| chloroxylenol             | DB11121          | molecular entity  | organic   | de novo         | D08AE05                                                                         | 1980                  |
| chlorpromazine            | DB00477          | molecular entity  | organic   | de novo         | N05AA01                                                                         | 1957                  |
| cholera vaccine           |                  | biological entity | proteins  |                 | J07AE                                                                           |                       |
| ciclosporin               | DB00091          | molecular entity  | organic   | natural         | L04AD01; S01XA18                                                                | 1983                  |
| ciprofloxacin             | DB00537          | molecular entity  | organic   | de novo         | S01AE03; S03AA07; J01RA12; J01MA02; J01RA10; S02AA15; J01RA11                   | 1987                  |
| cisplatin                 | DB00515          | molecular entity  | inorganic |                 | L01XA01                                                                         |                       |
| clarithromycin            | DB01211          | molecular entity  | organic   | Nature-inspired | A02BD07; A02BD06; A02BD04; A02BD09; J01FA09; A02BD05                            | 1991                  |
| clavulanic acid           | DB00766          | molecular entity  | organic   | natural         | J01CR                                                                           | 1984                  |
| clindamycin               | DB01190          | molecular entity  | organic   | Nature-inspired | J01FF01; D10AF01; D10AF51; G01AA10                                              | 1970                  |
| clindamycin palmitate     | DB01190          | molecular entity  | organic   | Nature-inspired | J01FF01; D10AF01; D10AF51; G01AA10                                              | 1986                  |
| clofazimine               | DB00845          | molecular entity  | organic   | de novo         | J04BA01                                                                         | 1986                  |
| clomifene                 | DB00882          | molecular entity  | organic   | de novo         | G03GB02                                                                         | 1967                  |

| EM NAME                       | DRUGBANK ID CODE | CLASSIFICATION    |          |                 | ATC CODE/S                                                    | FDA year of approval* |
|-------------------------------|------------------|-------------------|----------|-----------------|---------------------------------------------------------------|-----------------------|
|                               |                  | LEVEL A           | LEVEL B  | LEVEL C         |                                                               |                       |
| clomipramine                  | DB01242          | molecular entity  | organic  | de novo         | N06AA04                                                       | 1989                  |
| clopidogrel                   | DB00758          | molecular entity  | organic  | de novo         | B01AC04                                                       | 1997                  |
| clotrimazole                  | DB00257          | molecular entity  | organic  | de novo         | G01AF02; D01AC01; A01AB18                                     | 1975                  |
| cloxacillin                   | DB01147          | molecular entity  | organic  | Nature-inspired | J01CF02                                                       | 1971                  |
| clozapine                     | DB00363          | molecular entity  | organic  | de novo         | N05AH02                                                       | 1989                  |
| Coagulation Factor IX Human   | DB13152          | biological entity | proteins |                 | B02BD04                                                       |                       |
| Coagulation Factor VIII Human | DB14473          | biological entity | proteins |                 | B02BD14                                                       |                       |
| coal tar                      |                  | others            | mixtures |                 |                                                               |                       |
| codeine                       | DB00318          | molecular entity  | organic  | natural         | R05DA04; N02AA59; N02AA79                                     | 1950                  |
| colecalfiferol                | DB00169          | molecular entity  | organic  | natural         | M05BB07; M05BB05; M05BB04; M05BB08; A11CC05; M05BX53; M05BB03 |                       |
| colistin                      | DB00803          | molecular entity  | organic  | natural         | J01XB01; A07AA10                                              | 2007                  |
| condoms                       |                  | others            | devices  |                 |                                                               |                       |
| copper-containing device      |                  | others            | devices  |                 |                                                               |                       |
| cyclizine                     | DB01176          | molecular entity  | organic  | de novo         | R06AE03; R06AE53                                              | 1966                  |
| cyclophosphamide              | DB00531          | molecular entity  | organic  | de novo         | L01AA01                                                       | 1959                  |
| cycloserine                   | DB00260          | molecular entity  | organic  | natural         | J04AB01                                                       | 1964                  |
| cytarabine                    | DB00987          | molecular entity  | organic  | Nature-inspired | L01BC01                                                       | 1969                  |
| dabigatran etexilate          | DB06695          | molecular entity  | organic  | de novo         | B01AE07                                                       | 2010                  |
| dacarbazine                   | DB00851          | molecular entity  | organic  | de novo         | L01AX04                                                       | 1975                  |
| daclatasvir                   | DB09102          | molecular entity  | organic  | de novo         | J05AX14                                                       | 2015                  |
| dactinomycin                  | DB00970          | molecular entity  | organic  | natural         | L01DA01                                                       | 1964                  |
| dapsone                       | DB00250          | molecular entity  | organic  | de novo         | D10AX05; J04BA02                                              | 1979                  |
| darunavir                     | DB01264          | molecular entity  | organic  | de novo         | J05AR14; J05AE10                                              | 2006                  |
| dasabuvir                     | DB09183          | molecular entity  | organic  | de novo         | J05AX16; J05AX66                                              | 2014                  |
| dasatinib                     | DB01254          | molecular entity  | organic  | de novo         | L01XE06                                                       | 2006                  |
| daunorubicin                  | DB00694          | molecular entity  | organic  | natural         | L01DB02                                                       | 1979                  |

| EM NAME                 | DRUGBANK ID CODE | CLASSIFICATION    |          |                 | ATC CODE/S                                                                                                                                     | FDA year of approval* |
|-------------------------|------------------|-------------------|----------|-----------------|------------------------------------------------------------------------------------------------------------------------------------------------|-----------------------|
|                         |                  | LEVEL A           | LEVEL B  | LEVEL C         |                                                                                                                                                |                       |
| deferoramine            | DB00746          | molecular entity  | organic  | natural         | V03AC01                                                                                                                                        | 1968                  |
| delamanid               | DB11637          | molecular entity  | organic  | de novo         | J04AK06                                                                                                                                        |                       |
| dengue vaccine          | DB14764          | biological entity | proteins |                 | J07BX                                                                                                                                          |                       |
| desmopressin            | DB00035          | biological entity | proteins |                 | H01BA02                                                                                                                                        |                       |
| dexamethasone phosphate | DB01234          | molecular entity  | organic  | Nature-inspired | D07XB05; S01CA01; S03CA01; D07CB04; A01AC02; S03BA01; H02AB02; S01BA01; R01AD53; S01CB01; D10AA03; S02BA06; S02CA06; D07AB19; C05AA09; R01AD03 | 1959                  |
| dextran 70              | DB09255          | others            | mixtures |                 |                                                                                                                                                |                       |
| diaphragms              |                  | others            | devices  |                 |                                                                                                                                                |                       |
| diazepam                | DB00829          | molecular entity  | organic  | de novo         | N05BA01                                                                                                                                        | 1963                  |
| diazoxide               | DB01119          | molecular entity  | organic  | de novo         | C02DA01; V03AH01                                                                                                                               | 1973                  |
| diethylcarbazine        | DB00711          | molecular entity  | organic  | de novo         | P02CB02                                                                                                                                        | 1982                  |
| digoxin                 | DB00390          | molecular entity  | organic  | natural         | C01AA05                                                                                                                                        | 1954                  |
| dihydroartemisinin      | DB11638          | molecular entity  | organic  | Nature-inspired | P01BF05; P01BF; P01BE05                                                                                                                        |                       |
| diloxanide furoate      | DB14638          | molecular entity  | organic  | de novo         |                                                                                                                                                |                       |
| dimercaprol             | DB06782          | molecular entity  | organic  | de novo         | V03AB09                                                                                                                                        | 1946                  |
| dinoprostone            | DB00917          | molecular entity  | organic  | natural         |                                                                                                                                                | 1977                  |
| diphtheria antitoxin    |                  | biological entity | proteins |                 | J06AA01                                                                                                                                        |                       |
| diphtheria vaccine      |                  | biological entity | proteins |                 | J07AF                                                                                                                                          |                       |
| docetaxel               | DB01248          | molecular entity  | organic  | Nature-inspired | L01CD02                                                                                                                                        | 1996                  |
| docusate sodium         | DB11089          | molecular entity  | organic  | de novo         | A06AA02; A06AG10                                                                                                                               | 1900                  |
| dolutegravir            | DB08930          | molecular entity  | organic  | de novo         | J05AX12; J05AR13                                                                                                                               | 2013                  |
| dopamine                | DB00988          | molecular entity  | organic  | natural         | C01CA04                                                                                                                                        | 1974                  |
| doxorubicin             | DB00997          | molecular entity  | organic  | natural         | L01DB01                                                                                                                                        | 1974                  |
| doxycycline             | DB00254          | molecular entity  | organic  | Nature-inspired | A01AB22; J01AA02                                                                                                                               | 1967                  |
| efavirenz               | DB00625          | molecular entity  | organic  | de novo         | J05AG03; J05AR11; J05AR06                                                                                                                      | 1998                  |
| eflornithine            | DB06243          | molecular entity  | organic  | Nature-inspired | P01CX03; D11AX16                                                                                                                               | 2000                  |

| EM NAME                           | DRUGBANK ID CODE | CLASSIFICATION    |               |                 | ATC CODE/S                                                             | FDA year of approval* |
|-----------------------------------|------------------|-------------------|---------------|-----------------|------------------------------------------------------------------------|-----------------------|
|                                   |                  | LEVEL A           | LEVEL B       | LEVEL C         |                                                                        |                       |
| emtricitabine                     | DB00879          | molecular entity  | organic       | Nature-inspired | J05AR17; J05AR19; J05AR09; J05AR08; J05AR18; J05AR06; J05AR03; J05AF09 | 2003                  |
| enalapril                         | DB00584          | molecular entity  | organic       | Nature-inspired | C09BB02; C09AA02; C09BB06; C09BA02                                     | 1985                  |
| enoxaparin                        | DB01225          | biological entity | carbohydrates |                 | B01AB05                                                                |                       |
| entecavir                         | DB00442          | molecular entity  | organic       | Nature-inspired | J05AF10                                                                | 2005                  |
| ephedrine                         | DB01364          | molecular entity  | organic       | natural         | S01FB02; R01AB05; R01AA03; A08AA56; R03CA02; C01CA26                   | 1948                  |
| epinephrine                       | DB00668          | molecular entity  | organic       | natural         | R03AA01; B02BC09; A01AD01; R01AA14; C01CA24; S01EA51; R03AK01; S01EA01 | 1951                  |
| ergocalciferol                    | DB00153          | molecular entity  | organic       | natural         | A11CC01                                                                | 1941                  |
| ergometrine                       | DB01253          | molecular entity  | organic       | natural         | G02AB03                                                                | 2006                  |
| erlotinib                         | DB00530          | molecular entity  | organic       | de novo         | L01XE03                                                                | 2004                  |
| erythromycin                      | DB00199          | molecular entity  | organic       | natural         | J01FA01; S01AA17; D10AF52; D10AF02                                     | 1964                  |
| erythropoiesis-stimulating agents |                  | biological entity | proteins      |                 | B03XA                                                                  |                       |
| estradiol cypionate               | DB00783          | molecular entity  | organic       | Nature-inspired | G03CA03                                                                | 1979                  |
| ethambutol                        | DB00330          | molecular entity  | organic       | de novo         | J04AM06; J04AK02; J04AM03                                              | 1967                  |
| ethanol                           | DB00898          | molecular entity  | organic       | natural         | D08AX08; V03AB16; V03AZ01                                              | 1990                  |
| ethinylestradiol                  | DB00977          | molecular entity  | organic       | Nature-inspired | G03AA16; G03AA03; G03AA08; L02AA03; G03AA13; G03CA01                   | 1973                  |
| ethionamide                       | DB00609          | molecular entity  | organic       | de novo         | J04AD03                                                                | 1965                  |
| ethosuximide                      | DB00593          | molecular entity  | organic       | de novo         | N03AD51; N03AD01                                                       | 1960                  |
| etonogestrel                      | DB00294          | molecular entity  | organic       | Nature-inspired | G03AC08                                                                | 2001                  |
| etoposide                         | DB00773          | molecular entity  | organic       | Nature-inspired | L01CB01                                                                | 1983                  |
| fentanyl                          | DB00813          | molecular entity  | organic       | Nature-inspired | N02AB03; N01AH01; N01AH51                                              | 1968                  |
| ferrous salt                      |                  | molecular entity  | inorganic     |                 |                                                                        |                       |
| fexinidazole                      | DB12265          | molecular entity  | organic       | de novo         | P01CA03                                                                |                       |
| filgrastim                        | DB00099          | biological entity | proteins      |                 | L03AA02                                                                |                       |
| fluconazole                       | DB00196          | molecular entity  | organic       | de novo         | D01AC15; J02AC01; J01RA07                                              | 1990                  |
| flucytosine                       | DB01099          | molecular entity  | organic       | Nature-inspired | D01AE21; J02AX01                                                       | 1971                  |

| EM NAME                               | DRUGBANK ID CODE | CLASSIFICATION    |               |                 | ATC CODE/S                                                       | FDA year of approval* |
|---------------------------------------|------------------|-------------------|---------------|-----------------|------------------------------------------------------------------|-----------------------|
|                                       |                  | LEVEL A           | LEVEL B       | LEVEL C         |                                                                  |                       |
| fludarabine                           | DB01073          | molecular entity  | organic       | Nature-inspired | L01BB05                                                          | 1991                  |
| fludrocortisone acetate               | DB00687          | molecular entity  | organic       | Nature-inspired | S01CA06; H02AA02; H02AA02; S02CA07; S03CA05                      | 1955                  |
| fluorescein                           | DB00693          | others            | diagnostics   |                 | S01JA01; S01JA51                                                 |                       |
| fluorouracil                          | DB00544          | molecular entity  | organic       | Nature-inspired | L01BC02; L01BC52                                                 | 1962                  |
| fluoxetine                            | DB00472          | molecular entity  | organic       | de novo         | N06CA03; N06AB03                                                 | 1987                  |
| fluphenazine decanoate                | DB00623          | molecular entity  | organic       | de novo         | N05AB02                                                          | 1967                  |
| fluphenazine enantate                 | DB00623          | molecular entity  | organic       | de novo         | N05AB02                                                          | 1987                  |
| folic acid                            | DB00158          | molecular entity  | organic       | natural         | B03AE01; B03BB01; B03BB51                                        | 1947                  |
| fomepizole                            | DB01213          | molecular entity  | organic       | de novo         | V03AB34                                                          | 1997                  |
| formoterol                            | DB00983          | molecular entity  | organic       | Nature-inspired | R03AK07; R03AK11; R03AK09; R03AK08; R03AC13; R03AL05             | 2001                  |
| fosfomycin                            | DB00828          | molecular entity  | organic       | natural         | J01XX01                                                          | 1996                  |
| fresh frozen plasma                   |                  | others            | mixtures      |                 |                                                                  |                       |
| furosemide                            | DB00695          | molecular entity  | organic       | de novo         | C03CB01; C03CA01; C03EB01                                        | 1966                  |
| gemcitabine                           | DB00441          | molecular entity  | organic       | Nature-inspired | L01BC05                                                          | 1996                  |
| gentamicin                            | DB00798          | molecular entity  | organic       | natural         | S01AA11; S03AA06; D06AX07; J01GB03; S02AA14                      | 1973                  |
| glecaprevir                           | DB13879          | molecular entity  | organic       | de novo         | J05AP57                                                          | 2017                  |
| gliclazide                            | DB01120          | molecular entity  | organic       | de novo         | A10BB09                                                          |                       |
| glucagon                              | DB00040          | biological entity | proteins      |                 | H04AA01                                                          |                       |
| glucose                               | DB01914          | molecular entity  | organic       | natural         | C05BB56; V06DC01; B05CX01; V04CA02                               | 1953                  |
| glutaral                              | DB03266          | molecular entity  | organic       | de novo         | D08AX09                                                          |                       |
| griseofulvin                          | DB00400          | molecular entity  | organic       | natural         | D01AA08; D01BA01                                                 | 1962                  |
| Haemophilus influenzae type b vaccine |                  | biological entity | proteins      |                 | J07AG01                                                          |                       |
| haloperidol                           | DB00502          | molecular entity  | organic       | de novo         | N05AD01                                                          | 1967                  |
| halothane                             | DB01159          | molecular entity  | organic       | de novo         | N01AB01                                                          | 1958                  |
| heparin sodium                        | DB01109          | biological entity | carbohydrates |                 | C05BA; S01XA14; C05BA53; S01XA; B01AB51; B01AB; B01AB01; C05BA03 |                       |
| hepatitis A vaccine                   |                  | biological entity | proteins      |                 | J07BC02                                                          |                       |



| EM NAME                           | DRUGBANK ID CODE | CLASSIFICATION    |             |                 | ATC CODE/S                                                                                                                                     | FDA year of approval* |
|-----------------------------------|------------------|-------------------|-------------|-----------------|------------------------------------------------------------------------------------------------------------------------------------------------|-----------------------|
|                                   |                  | LEVEL A           | LEVEL B     | LEVEL C         |                                                                                                                                                |                       |
| hepatitis B vaccine               |                  | biological entity | proteins    |                 | J07BC01                                                                                                                                        |                       |
| HPV vaccine                       |                  | biological entity | proteins    |                 | J07BM03                                                                                                                                        |                       |
| hydralazine                       | DB01275          | molecular entity  | organic     | de novo         | C02DB02; C02LG02                                                                                                                               | 1953                  |
| hydrochlorothiazide               | DB00999          | molecular entity  | organic     | de novo         | C09DX03; C09XA54; C03AX01; C03AA03; C09DX01; C03AB03; C09XA52; C09BX03; C03EA01                                                                | 1959                  |
| hydrocortisone                    | DB00741          | molecular entity  | organic     | natural         | S02BA01; A07EA02; C05AA01; A01AC03; S01CB03; R01AD60; S01BA02; D07AA02; D07XA01; S01BB01; S02CA03; D07BA04; H02AB09; S03CA04; D07CA01; S01CA03 | 1952                  |
| hydrocortisone acetate            | DB14539          | molecular entity  | organic     | Nature-inspired |                                                                                                                                                | 1954                  |
| hydrocortisone succinate          | DB14545          | molecular entity  | organic     | Nature-inspired |                                                                                                                                                | 1955                  |
| hydroxocobalamin                  | DB00200          | molecular entity  | organic     | natural         | B03BA03; V03AB33; B03BA53                                                                                                                      | 1975                  |
| hydroxycarbamide                  | DB01005          | molecular entity  | organic     | natural         | L01XX05                                                                                                                                        | 1998                  |
| hydroxychloroquine                | DB01611          | molecular entity  | organic     | Nature-inspired | P01BA02                                                                                                                                        | 1955                  |
| hyoscine butylbromide             | DB09300          | molecular entity  | organic     | Nature-inspired | A03BB01; A03DB04                                                                                                                               | 1979                  |
| hyoscine hydrobromide             | DB00747          | molecular entity  | organic     | natural         | A04AD51; A04AD01; S01FA02; N05CM05                                                                                                             | 1979                  |
| ibuprofen                         | DB01050          | molecular entity  | organic     | de novo         | C01EB16; M02AA13; M01AE51; N02AJ19; R02AX02; N02AJ08; G02CC01; M01AE01                                                                         | 1974                  |
| ifosfamide                        | DB01181          | molecular entity  | organic     | de novo         | L01AA06                                                                                                                                        | 1987                  |
| imatinib                          | DB00619          | molecular entity  | organic     | de novo         | L01XE01                                                                                                                                        | 2001                  |
| influenza vaccine                 |                  | biological entity | proteins    |                 | J07BB02                                                                                                                                        |                       |
| insulin injection                 | DB00030          | biological entity | proteins    |                 | A10AC01; A10AD01; A10AE01; A10A; A10AF01; A10AB01                                                                                              |                       |
| intermediate-acting insulin       |                  | biological entity | proteins    |                 | A10AC                                                                                                                                          |                       |
| intraperitoneal dialysis solution |                  | others            | solutions   |                 |                                                                                                                                                |                       |
| iodine                            | DB05382          | molecular entity  | inorganic   |                 | D08AG03                                                                                                                                        |                       |
| iohexol                           | DB01362          | others            | diagnostics |                 | V08AB02                                                                                                                                        |                       |
| ipratropium                       | DB00332          | molecular entity  | organic     | Nature-inspired | R01AX03; R03AL01; R03AL02; R03BB01                                                                                                             | 1986                  |
| irinotecan                        | DB00762          | molecular entity  | organic     | Nature-inspired | L01XX19                                                                                                                                        | 1996                  |

| EM NAME                       | DRUGBANK ID CODE | CLASSIFICATION    |           |                 | ATC CODE/S                                                                                        | FDA year of approval* |
|-------------------------------|------------------|-------------------|-----------|-----------------|---------------------------------------------------------------------------------------------------|-----------------------|
|                               |                  | LEVEL A           | LEVEL B   | LEVEL C         |                                                                                                   |                       |
| isoflurane                    | DB00753          | molecular entity  | organic   | de novo         | N01AB06                                                                                           | 1979                  |
| isoniazid                     | DB00951          | molecular entity  | organic   | Nature-inspired | J04AM02; J04AC01; J04AM03; J04AM04; J04AM06; J04AC51; J04AM01; J04AM05                            | 1952                  |
| isosorbide dinitrate          | DB00883          | molecular entity  | organic   | Nature-inspired | C01DA08; C01DA58; C05AE02                                                                         | 1959                  |
| itraconazole                  | DB01167          | molecular entity  | organic   | de novo         | J02AC02                                                                                           | 1992                  |
| ivermectin                    | DB00602          | molecular entity  | organic   | Nature-inspired | P02CF01; D11AX22                                                                                  | 1996                  |
| Japanese encephalitis vaccine |                  | biological entity | proteins  |                 | J07BA                                                                                             |                       |
| ketamine                      | DB01221          | molecular entity  | organic   | de novo         | N01AX03                                                                                           | 1970                  |
| lactic acid                   | DB04398          | molecular entity  | organic   | natural         | G01AD01; QP53AG02                                                                                 | 1971                  |
| lactulose                     | DB00581          | molecular entity  | organic   | Nature-inspired | A06AD11; A06AD61                                                                                  | 1976                  |
| lamivudine                    | DB00709          | molecular entity  | organic   | Nature-inspired | J05AF05; J05AR11; J05AR05; J05AR04; J05AR02; J05AR01; J05AR27; J05AR12; J05AR16; J05AR13; J05AR07 | 1995                  |
| lamotrigine                   | DB00555          | molecular entity  | organic   | de novo         | N03AX09                                                                                           | 1994                  |
| latanoprost                   | DB00654          | molecular entity  | organic   | Nature-inspired | S01EE01                                                                                           | 1996                  |
| ledipasvir                    | DB09027          | molecular entity  | organic   | de novo         | J05AX65                                                                                           | 2014                  |
| lenalidomide                  | DB00480          | molecular entity  | organic   | de novo         | L04AX04                                                                                           | 2005                  |
| leuprorelin                   | DB00007          | biological entity | proteins  |                 | L02AE02                                                                                           |                       |
| levamisole                    | DB00848          | molecular entity  | organic   | de novo         | P02CE01                                                                                           | 1990                  |
| levodopa                      | DB01235          | molecular entity  | organic   | natural         | N04BA03; N04BA01; N04BA02                                                                         | 1970                  |
| levofloxacin                  | DB01137          | molecular entity  | organic   | de novo         | J01MA12; A02BD10; J01RA05; S01AE05                                                                | 1996                  |
| levonorgestrel                | DB00367          | molecular entity  | organic   | Nature-inspired | G03FA11; G03FB09; G03FB01; G03AD01; G03AC03; G03AB03; G03FA10; G03AA07; G03AA06                   | 1990                  |
| levothyroxine                 | DB00451          | molecular entity  | organic   | natural         | H03AA01                                                                                           | 2000                  |
| lidocaine                     | DB00281          | molecular entity  | organic   | de novo         | D04AB01; C05AD01; S01HA07; R02AD02; N01BB02; S02DA01; C01BB01; N01BB52                            | 1948                  |
| linezolid                     | DB00601          | molecular entity  | organic   | de novo         | J01XX08                                                                                           | 2000                  |
| lisinopril                    | DB00722          | molecular entity  | organic   | Nature-inspired | C09BA03; C09BB03; C10BX07; C09AA03                                                                | 1987                  |
| lithium carbonate             | DB01356          | molecular entity  | inorganic |                 | N05AN01                                                                                           |                       |

| EM NAME                     | DRUGBANK ID CODE | CLASSIFICATION    |             |                 | ATC CODE/S                                                                                                                            | FDA year of approval* |
|-----------------------------|------------------|-------------------|-------------|-----------------|---------------------------------------------------------------------------------------------------------------------------------------|-----------------------|
|                             |                  | LEVEL A           | LEVEL B     | LEVEL C         |                                                                                                                                       |                       |
| loperamide                  | DB00836          | molecular entity  | organic     | Nature-inspired | A07DA03; A07DA53                                                                                                                      | 1976                  |
| lopinavir                   | DB01601          | molecular entity  | organic     | de novo         | J05AR10                                                                                                                               | 2000                  |
| loratadine                  | DB00455          | molecular entity  | organic     | de novo         | R06AX13                                                                                                                               | 1993                  |
| lorazepam                   | DB00186          | molecular entity  | organic     | de novo         | N05BA56; N05BA06                                                                                                                      | 1977                  |
| losartan                    | DB00678          | molecular entity  | organic     | de novo         | C09CA01; C09DA01; C09DB06                                                                                                             | 1995                  |
| Lugol's solution            | DB14492          | other             | solutions   |                 |                                                                                                                                       |                       |
| lumefantrine                | DB06708          | molecular entity  | organic     | de novo         | P01BF01                                                                                                                               | 2009                  |
| magnesium sulfate           | DB00653          | molecular entity  | inorganic   |                 | A12CC02; D11AX05; B05XA05; V04CC02; A06AD04                                                                                           |                       |
| mannitol                    | DB00742          | molecular entity  | organic     | natural         | R05CB16; B05BC01; B05CX04; A06AD16                                                                                                    | 1964                  |
| measles vaccine             |                  | biological entity | proteins    |                 | J07BD                                                                                                                                 |                       |
| mebendazole                 | DB00643          | molecular entity  | organic     | de novo         | P02CA51; P02CA01                                                                                                                      | 1974                  |
| medroxyprogesterone acetate | DB00603          | molecular entity  | organic     | Nature-inspired | G03AC06; G03DA02; L02AB02                                                                                                             | 1959                  |
| mefloquine                  | DB00358          | molecular entity  | organic     | Nature-inspired | P01BC02; P01BF02                                                                                                                      | 1989                  |
| meglumine antimoniate       | DB13732          | molecular entity  | organic     | Nature-inspired | P01CB01; QP51AB01                                                                                                                     |                       |
| meglumine iotroxate         | DB08945          | others            | diagnostics |                 | V08AC02                                                                                                                               |                       |
| melarsoprol                 | DB12864          | molecular entity  | organic     | de novo         | P01CD01                                                                                                                               |                       |
| melphalan                   | DB01042          | molecular entity  | organic     | de novo         | L01AA03                                                                                                                               | 1964                  |
| meningococcal meningitis    |                  | biological entity | proteins    |                 | J07AH                                                                                                                                 |                       |
| mercaptopurine              | DB01033          | molecular entity  | organic     | Nature-inspired | L01BB02                                                                                                                               | 1953                  |
| meropenem                   | DB00760          | molecular entity  | organic     | Nature-inspired | J01DH02; J01DH52                                                                                                                      | 1996                  |
| mesna                       | DB09110          | molecular entity  | organic     | de novo         | V03AF01; R05CB05                                                                                                                      | 1988                  |
| metformin                   | DB00331          | molecular entity  | organic     | Nature-inspired | A10BD05; A10BD03; A10BD11; A10BD07; A10BD17; A10BD20; A10BD18; A10BD08; A10BD10; A10BD13; A10BD14; A10BA02; A10BD16; A10BD15; A10BD02 | 1995                  |
| methadone                   | DB00333          | molecular entity  | organic     | Nature-inspired | N02AC52; N07BC02                                                                                                                      | 1947                  |
| methimazole                 | DB00763          | molecular entity  | organic     | de novo         | H03BB52; H03BB02                                                                                                                      | 1950                  |

| EM NAME                      | DRUGBANK ID CODE | CLASSIFICATION    |          |                 | ATC CODE/S                                                                                                                   | FDA year of approval* |
|------------------------------|------------------|-------------------|----------|-----------------|------------------------------------------------------------------------------------------------------------------------------|-----------------------|
|                              |                  | LEVEL A           | LEVEL B  | LEVEL C         |                                                                                                                              |                       |
| methotrexate                 | DB00563          | molecular entity  | organic  | Nature-inspired | L04AX03; L01BA01                                                                                                             | 1953                  |
| methyl dopa                  | DB00968          | molecular entity  | organic  | Nature-inspired | C02LB01; C02AB01                                                                                                             | 1962                  |
| methylprednisolone succinate | DB14644          | molecular entity  | organic  | Nature-inspired | H02BX01; D10AA02; D07CA02; S01CA08; D07AA01; H02AB04                                                                         | 1959                  |
| methylthioninium chloride    | DB09241          | molecular entity  | organic  | de novo         | V04CG05; V03AB17                                                                                                             | 1990                  |
| metoclopramide               | DB01233          | molecular entity  | organic  | de novo         | A03FA01                                                                                                                      | 1979                  |
| metronidazole                | DB00916          | molecular entity  | organic  | de novo         | A01AB17; D06BX01; A02BD01; J01RA03; A02BD11; A02BD08; P01AB51; G01AF01; J01XD01; J01RA10; P01AB01; A02BD02; J01RA04; A02BD03 | 1963                  |
| metronidazole benzoate       |                  | molecular entity  | organic  | de novo         | A01AB17; D06BX01; A02BD01; J01RA03; A02BD11; A02BD08; P01AB51; G01AF01; J01XD01; J01RA10; P01AB01; A02BD02; J01RA04; A02BD03 | 1963                  |
| miconazole                   | DB01110          | molecular entity  | organic  | de novo         | J02AB01; A07AC01; G01AF04; D01AC02; A01AB09; D01AC52; S02AA13                                                                | 1978                  |
| midazolam                    | DB00683          | molecular entity  | organic  | de novo         | N05CD08                                                                                                                      | 1985                  |
| mifepristone                 | DB00834          | molecular entity  | organic  | Nature-inspired | G03XB51; G03XB01                                                                                                             | 2000                  |
| miltefosine                  | DB09031          | molecular entity  | organic  | Nature-inspired | L01XX09                                                                                                                      | 2014                  |
| misoprostol                  | DB00929          | molecular entity  | organic  | Nature-inspired | M01AE56; G02AD06; A02BB01                                                                                                    | 1988                  |
| morphine                     | DB00295          | molecular entity  | organic  | natural         | N02AA01; N02AG01; N02AA51; A07DA52; R05DA05                                                                                  | 1971                  |
| moxifloxacin                 | DB00218          | molecular entity  | organic  | de novo         | J01MA14; S01AE07                                                                                                             | 1999                  |
| multiple micronutrient       |                  | others            | mixtures |                 |                                                                                                                              |                       |
| mumps vaccine                |                  | biological entity | proteins |                 | J07BE01                                                                                                                      |                       |
| mupirocin                    | DB00410          | molecular entity  | organic  | natural         | R01AX06; D06AX09                                                                                                             | 1987                  |
| naloxone                     | DB01183          | molecular entity  | organic  | Nature-inspired | N02AA53; A06AH04; V03AB15                                                                                                    | 1971                  |
| natamycin                    | DB00826          | molecular entity  | organic  | natural         | S01AA10; A07AA03; D01AA02; G01AA02; A01AB10                                                                                  | 1978                  |
| neostigmine                  | DB01400          | molecular entity  | organic  | Nature-inspired | N07AA51; S01EB06; N07AA01                                                                                                    | 1973                  |
| nevirapine                   | DB00238          | molecular entity  | organic  | de novo         | J05AR05; J05AR07; J05AG01                                                                                                    | 1996                  |
| niclosamide                  | DB06803          | molecular entity  | organic  | de novo         | P02DA01                                                                                                                      | 1982                  |
| nicotinamide                 | DB02701          | molecular entity  | organic  | natural         | A11HA01                                                                                                                      | 1988                  |

| EM NAME                      | DRUGBANK ID CODE | CLASSIFICATION    |           |                 | ATC CODE/S                                           | FDA year of approval* |
|------------------------------|------------------|-------------------|-----------|-----------------|------------------------------------------------------|-----------------------|
|                              |                  | LEVEL A           | LEVEL B   | LEVEL C         |                                                      |                       |
| nicotine replacement therapy | DB00184          | molecular entity  | organic   | natural         | N07BA01                                              | 1984                  |
| nifedipine                   | DB01115          | molecular entity  | organic   | de novo         | C08CA05; C08GA01; C08CA55                            | 1981                  |
| nifurtimox                   | DB11820          | molecular entity  | organic   | de novo         | P01CC01                                              |                       |
| nilotinib                    | DB04868          | molecular entity  | organic   | de novo         | L01XE08                                              | 2007                  |
| nitrofurantoin               | DB00698          | molecular entity  | organic   | de novo         | J01XE01; J01XE51                                     | 1953                  |
| nitroglycerin                | DB00727          | molecular entity  | organic   | Nature-inspired | C01DA02; C05AE01; C01DA52                            | 1981                  |
| nitrous oxide                | DB06690          | molecular entity  | inorganic |                 | N01AX63; N01AX13                                     |                       |
| nivolumab                    | DB09035          | biological entity | proteins  |                 | L01XC17                                              |                       |
| norethisterone               | DB00717          | molecular entity  | organic   | Nature-inspired | G03AA05; G03AC01; G03FB05; G03DC02; G03FA01; G03AB04 | 1973                  |
| norethisterone enantate      | DB14678          | molecular entity  | organic   | Nature-inspired | G03DC02                                              | 1973                  |
| normal immunoglobulin        |                  | biological entity | proteins  |                 | J06BA                                                |                       |
| nystatin                     | DB00646          | molecular entity  | organic   | natural         | D01AA01; G01AA51; A07AA02; G01AA01                   | 1964                  |
| ofloxacin                    | DB01165          | molecular entity  | organic   | de novo         | S01AE01; J01MA01; S02AA16; J01RA09                   | 1990                  |
| ombitasvir                   | DB09296          | molecular entity  | organic   | de novo         | J05AX67; J05AX66                                     | 2015                  |
| omeprazole                   | DB00338          | molecular entity  | organic   | de novo         | A02BC01; A02BD05; A02BD01                            | 1989                  |
| ondansetron                  | DB00904          | molecular entity  | organic   | de novo         | A04AA01                                              | 1991                  |
| oral rehydration             |                  | others            | solutions |                 |                                                      |                       |
| oral rehydration salts       |                  | others            | solutions |                 |                                                      |                       |
| oseltamivir                  | DB00198          | molecular entity  | organic   | Nature-inspired | J05AH02                                              | 1999                  |
| oxaliplatin                  | DB00526          | molecular entity  | organic   | de novo         | L01XA03                                              | 2002                  |
| oxamniquine                  | DB01096          | molecular entity  | organic   | de novo         | P02BA02                                              | 1980                  |
| oxygen                       | DB09140          | molecular entity  | inorganic |                 | V03AN01                                              |                       |
| oxytocin                     | DB00107          | biological entity | proteins  |                 | G02AC01; H01BB02                                     |                       |
| paclitaxel                   | DB01229          | molecular entity  | organic   | natural         | L01CD01; L01CD03                                     | 1992                  |
| p-aminosalicylic acid        | DB00233          | molecular entity  | organic   | Nature-inspired | J04AA03; J04AA01; J04AA02                            | 1994                  |
| pancreatic enzymes           |                  | biological entity | proteins  |                 |                                                      |                       |
| paracetamol                  | DB00316          | molecular entity  | organic   | de novo         | N02BE01; N02BE51; N02BE71                            | 1968                  |

| EM NAME                                       | DRUGBANK ID CODE | CLASSIFICATION    |                       |                 | ATC CODE/S                                  | FDA year of approval* |
|-----------------------------------------------|------------------|-------------------|-----------------------|-----------------|---------------------------------------------|-----------------------|
|                                               |                  | LEVEL A           | LEVEL B               | LEVEL C         |                                             |                       |
| paritaprevir                                  | DB09297          | molecular entity  | organic               | de novo         | J05AX67; J05AX66                            | 2014                  |
| paromomycin                                   | DB01421          | molecular entity  | organic               | natural         | A07AA06                                     | 1969                  |
| pegaspargase                                  | DB00059          | biological entity | proteins              |                 | L01XX24                                     |                       |
| pegylated interferon alfa 2a                  |                  | biological entity | proteins              |                 | L03AB15                                     |                       |
| penicillamine                                 | DB00859          | molecular entity  | organic               | Nature-inspired | M01CC01                                     | 1970                  |
| pentamidine                                   | DB00738          | molecular entity  | organic               | de novo         | P01CX01                                     | 1984                  |
| permethrin                                    | DB04930          | molecular entity  | organic               | Nature-inspired | P03AC54; P03AC04                            | 1986                  |
| pertussis vaccine                             |                  | biological entity | proteins              |                 | J07AJ                                       |                       |
| phenobarbital                                 | DB01174          | molecular entity  | organic               | de novo         | N03AA02                                     | 1966                  |
| phenoxymethylpenicillin                       | DB00417          | molecular entity  | organic               | natural         | J01CE02                                     | 1995                  |
| phenytoin                                     | DB00252          | molecular entity  | organic               | de novo         | N03AB02; N03AB52                            | 1953                  |
| phytomenadione                                | DB01022          | molecular entity  | organic               | natural         | B02BA01                                     | 1955                  |
| pibrentasvir                                  | DB13878          | molecular entity  | organic               | de novo         | J05AP57                                     | 2017                  |
| pilocarpine                                   | DB01085          | molecular entity  | organic               | natural         | S01EB01; N07AX01; S01EB51                   | 1974                  |
| piperacillin                                  | DB00319          | molecular entity  | organic               | Nature-inspired | J01CR05; J01CA12                            | 1981                  |
| piperaquine                                   | DB13941          | molecular entity  | organic               | de novo         | P01BF05; P01BX02                            |                       |
| platelets                                     |                  | others            | blood and derivatives |                 |                                             |                       |
| plazomicin                                    | DB12615          | molecular entity  | organic               | Nature-inspired | J01GB14                                     | 2018                  |
| pneumococcal vaccine                          |                  | biological entity | proteins              |                 | J07AL                                       |                       |
| podophyllum resin                             | DB09094          | others            | mixtures              |                 |                                             |                       |
| poliomyelitis vaccine                         |                  | biological entity | proteins              |                 | J07BF                                       |                       |
| polymyxin B                                   | DB00781          | molecular entity  | organic               | natural         | S01AA18; J01XB02; S02AA11; S03AA03; A07AA05 | 1964                  |
| potassium chloride                            | DB00761          | molecular entity  | inorganic             |                 | B05XA01; A12BA51; A12BA01                   |                       |
| potassium ferric hexacyano-ferrate(II - 2H2O) |                  | molecular entity  | inorganic             |                 |                                             |                       |
| potassium iodide                              | DB06715          | molecular entity  | inorganic             |                 | R05CA02; V03AB21; S01XA04                   |                       |
| potassium permanganate                        | DB13831          | molecular entity  | inorganic             |                 | D08AX06; V03AB18                            |                       |

| EM NAME                  | DRUGBANK ID CODE | CLASSIFICATION    |                       |                 | ATC CODE/S                                                                                                                                                                | FDA year of approval* |
|--------------------------|------------------|-------------------|-----------------------|-----------------|---------------------------------------------------------------------------------------------------------------------------------------------------------------------------|-----------------------|
|                          |                  | LEVEL A           | LEVEL B               | LEVEL C         |                                                                                                                                                                           |                       |
| povidone iodine          | DB06812          | others            | solutions             |                 | R02AA15; D09AA09; G01AX11; D08AG02; S01AX18; D11AC06                                                                                                                      |                       |
| praziquantel             | DB01058          | molecular entity  | organic               | de novo         | P02BA01                                                                                                                                                                   | 1982                  |
| prednisolone             | DB00860          | molecular entity  | organic               | Nature-inspired | D07AA03; R01AD02; D07XA02; S01BB02; S02BA03; D07BA01; S03CA02; S01CB02; C05AA04; S01CA02; H02AB06; A01AC54; R01AD52; D07CA03; S02CA01; V03AB05; S03BA02; S01BA04; A07EA01 | 1955                  |
| primaquine               | DB01087          | molecular entity  | organic               | de novo         | P01BA03                                                                                                                                                                   | 1952                  |
| procaine                 | DB00721          | molecular entity  | organic               | de novo         | J01CE09                                                                                                                                                                   | 1948                  |
| procarbazine             | DB01168          | molecular entity  | organic               | de novo         | L01XB01                                                                                                                                                                   | 1969                  |
| progesterone             | DB00396          | molecular entity  | organic               | natural         | G03DA04; G03FA04                                                                                                                                                          | 1976                  |
| proguanil                | DB01131          | molecular entity  | organic               | Nature-inspired | P01BB51; P01BB01                                                                                                                                                          | 1948                  |
| propofol                 | DB00818          | molecular entity  | organic               | de novo         | N01AX10                                                                                                                                                                   | 1989                  |
| propranolol              | DB00571          | molecular entity  | organic               | Nature-inspired | C07AA05; C07FA05; C07BA05                                                                                                                                                 | 1967                  |
| propylthiouracil         | DB00550          | molecular entity  | organic               | Nature-inspired | H03BA02                                                                                                                                                                   | 1947                  |
| protamine sulfate        | DB09141          | biological entity | proteins              |                 | V03AB14                                                                                                                                                                   |                       |
| pyrantel                 | DB11156          | molecular entity  | organic               | de novo         | P02CC01                                                                                                                                                                   | 2001                  |
| pyrazinamide             | DB00339          | molecular entity  | organic               | Nature-inspired | J04AK01; J04AM06; J04AM05                                                                                                                                                 | 1971                  |
| pyridostigmine           | DB00545          | molecular entity  | organic               | Nature-inspired | N07AA02                                                                                                                                                                   | 1955                  |
| pyridoxine               | DB00165          | molecular entity  | organic               | natural         | A11HA02                                                                                                                                                                   | 1972                  |
| pyrimethamine            | DB00205          | molecular entity  | organic               | de novo         | P01BD51; P01BD01; P01BF04                                                                                                                                                 | 1953                  |
| pyronaridine             | DB12975          | molecular entity  | organic               | de novo         | P01BF06                                                                                                                                                                   |                       |
| quinine                  | DB00468          | molecular entity  | organic               | natural         | M09AA72; P01BC01                                                                                                                                                          | 2005                  |
| rabies vaccine           |                  | biological entity | proteins              |                 | J07BG01                                                                                                                                                                   |                       |
| raltegravir              | DB06817          | molecular entity  | organic               | de novo         | J05AR16; J05AX08                                                                                                                                                          | 2007                  |
| ranitidine               | DB00863          | molecular entity  | organic               | de novo         | A02BA02                                                                                                                                                                   | 1983                  |
| realgar-Indigo naturalis |                  | others            | mixtures              |                 |                                                                                                                                                                           |                       |
| red blood cells          |                  | others            | blood and derivatives |                 |                                                                                                                                                                           |                       |

| EM NAME                   | DRUGBANK ID CODE | CLASSIFICATION    |           |                 | ATC CODE/S                                                    | FDA year of approval* |
|---------------------------|------------------|-------------------|-----------|-----------------|---------------------------------------------------------------|-----------------------|
|                           |                  | LEVEL A           | LEVEL B   | LEVEL C         |                                                               |                       |
| retinol palmitate         |                  | molecular entity  | organic   | Nature-inspired |                                                               | 1949                  |
| ribavirin                 | DB00811          | molecular entity  | organic   | Nature-inspired | J05AB04                                                       | 1985                  |
| riboflavin                | DB00140          | molecular entity  | organic   | natural         | A11HA04                                                       | 1970                  |
| rifabutin                 | DB00615          | molecular entity  | organic   | Nature-inspired | J04AB04                                                       | 1992                  |
| rifampicin                | DB01045          | molecular entity  | organic   | Nature-inspired | J04AB02                                                       | 1971                  |
| rifapentine               | DB01201          | molecular entity  | organic   | Nature-inspired | J04AB05                                                       | 1998                  |
| risperidone               | DB00734          | molecular entity  | organic   | de novo         | N05AX08                                                       | 1993                  |
| ritonavir                 | DB00503          | molecular entity  | organic   | de novo         | J05AX67; J05AX66; J05AR10; J05AE03                            | 1996                  |
| rituximab                 | DB00073          | biological entity | proteins  |                 | L01XC02                                                       |                       |
| rotavirus vaccine         |                  | biological entity | proteins  |                 | J07BH                                                         |                       |
| rubella vaccine           |                  | biological entity | proteins  |                 | J07BJ                                                         |                       |
| salbutamol                | DB01001          | molecular entity  | organic   | Nature-inspired | R03AC02; R03CC02; R03AK04; R03AL02; R03AK13                   | 1981                  |
| salicylic acid            | DB00936          | molecular entity  | organic   | natural         | N02BA16; N02BA12; D01AE12; N02BA08; S01BC08; N02BA03; N02BA04 | 1938                  |
| selenium sulfide          | DB00971          | molecular entity  | inorganic |                 | D01AE13                                                       |                       |
| senna                     |                  | others            | mixtures  |                 |                                                               |                       |
| simvastatin               | DB00641          | molecular entity  | organic   | Nature-inspired | C10AA01; C10BA02; C10BA04; C10BX04; C10BX01                   | 1991                  |
| sodium calcium edetate    | DB14598          | molecular entity  | organic   | de novo         |                                                               | 2009                  |
| sodium chloride           | DB09153          | molecular entity  | inorganic |                 | B05XA03; B05CB01; S01XA03; A12CA01                            |                       |
| sodium fluoride           | DB09325          | molecular entity  | inorganic |                 | A01AA51; A01AA01; A12CD01                                     |                       |
| sodium hydrogen carbonate |                  | molecular entity  | inorganic |                 |                                                               |                       |
| sodium nitrite            | DB09112          | molecular entity  | inorganic |                 | V03AB08                                                       |                       |
| sodium nitroprusside      | DB00325          | molecular entity  | organic   | Nature-inspired |                                                               | 1974                  |
| sodium stibogluconate     | DB05630          | molecular entity  | organic   | Nature-inspired | P01CB02                                                       |                       |
| sodium thiosulfate        | DB09499          | molecular entity  | inorganic |                 |                                                               |                       |
| sofosbuvir                | DB08934          | molecular entity  | organic   | Nature-inspired | J05AX69; J05AX65; J05AX15                                     | 2013                  |
| spectinomycin             | DB00919          | molecular entity  | organic   | natural         | J01XX04                                                       | 1971                  |
| spironolactone            | DB00421          | molecular entity  | organic   | Nature-inspired | C03DA01                                                       | 1960                  |



| EM NAME                         | DRUGBANK ID CODE | CLASSIFICATION    |          |                 | ATC CODE/S                                                                      | FDA year of approval* |
|---------------------------------|------------------|-------------------|----------|-----------------|---------------------------------------------------------------------------------|-----------------------|
|                                 |                  | LEVEL A           | LEVEL B  | LEVEL C         |                                                                                 |                       |
| streptokinase                   | DB00086          | biological entity | proteins |                 | B01AD01; B06AA55                                                                |                       |
| streptomycin                    | DB01082          | molecular entity  | organic  | natural         | A07AA04; J01GA01; A07AA54; J04AM01                                              | 1946                  |
| succimer                        | DB00566          | molecular entity  | organic  | de novo         | V03AB                                                                           | 1991                  |
| sulfadiazine                    | DB00359          | molecular entity  | organic  | de novo         | J01EE06; J01EC02; J01EE02                                                       | 1941                  |
| sulfadoxine                     | DB01299          | molecular entity  | organic  | Nature-inspired | QJ01EW13                                                                        | 1981                  |
| sulfamethoxazole                | DB01015          | molecular entity  | organic  | Nature-inspired | J01EE01; J01EC01                                                                | 1973                  |
| sulfasalazine                   | DB00795          | molecular entity  | organic  | Nature-inspired | A07EC01                                                                         | 1950                  |
| suramin                         | DB04786          | molecular entity  | organic  | de novo         | P01CX02; P01CX02                                                                |                       |
| surfactant                      |                  | others            | mixtures |                 |                                                                                 |                       |
| suxamethonium                   | DB00202          | molecular entity  | organic  | Nature-inspired | M03AB01                                                                         | 1952                  |
| tamoxifen                       | DB00675          | molecular entity  | organic  | de novo         | L02BA01                                                                         | 1977                  |
| tazobactam                      | DB01606          | molecular entity  | organic  | Nature-inspired | J01CG02                                                                         | 1993                  |
| telmisartan                     | DB00966          | molecular entity  | organic  | de novo         | C09DB04; C09CA07; C09DA07                                                       | 1998                  |
| tenofovir disoproxil            | DB00300          | molecular entity  | organic  | Nature-inspired | J05AR11; J05AR09; J05AR24; J05AR08; J05AF07; J05AR06; J05AR12; J05AR03; J05AF07 | 2001                  |
| terbinafine                     | DB00857          | molecular entity  | organic  | de novo         | D01AE15; D01BA02                                                                | 1992                  |
| testosterone enanthate          | DB13944          | molecular entity  | organic  | Nature-inspired | G03EA02; G03BA03                                                                | 1953                  |
| tetanus vaccine                 |                  | biological entity | proteins |                 | J07AM                                                                           |                       |
| tetracaine                      | DB09085          | molecular entity  | organic  | de novo         | S01HA03; N01BA03; C05AD02; N01BA53; D04AB06                                     | 1958                  |
| tetracycline                    | DB00759          | molecular entity  | organic  | natural         | J01AA07; D06AA04; J01RA08; A02BD08; S01AA09; S03AA02; A01AB13; A02BD02; S02AA08 | 1953                  |
| thalidomide                     | DB01041          | molecular entity  | organic  | de novo         | L04AX02                                                                         | 1998                  |
| thiamine                        | DB00152          | molecular entity  | organic  | natural         | A11DA01                                                                         | 1972                  |
| tick-borne encephalitis vaccine |                  | biological entity | proteins |                 | J07BA                                                                           |                       |
| timolol                         | DB00373          | molecular entity  | organic  | Nature-inspired | S01ED51; S01ED01; C07BA06; C07DA06; C07AA06                                     | 1981                  |
| tioguanine                      | DB00352          | molecular entity  | organic  | Nature-inspired | L01BB03                                                                         | 1966                  |
| tiotropium                      | DB01409          | molecular entity  | organic  | Nature-inspired | R03AL06; R03BB04; R03BB54                                                       | 2004                  |
| tranexamic acid                 | DB00302          | molecular entity  | organic  | Nature-inspired | B02AA02                                                                         | 1986                  |

| EM NAME                                 | DRUGBANK ID CODE | CLASSIFICATION    |                       |                 | ATC CODE/S                                                    | FDA year of approval* |
|-----------------------------------------|------------------|-------------------|-----------------------|-----------------|---------------------------------------------------------------|-----------------------|
|                                         |                  | LEVEL A           | LEVEL B               | LEVEL C         |                                                               |                       |
| trastuzumab                             | DB00072          | biological entity | proteins              |                 | L01XC03                                                       |                       |
| triclabendazole                         | DB12245          | molecular entity  | organic               | de novo         | P02BX04                                                       | 2019                  |
| trimethoprim                            | DB00440          | molecular entity  | organic               | Nature-inspired | J01EA01; J01EE03; J01EE07; J01EE04; J01EE01; J01EE02; J01EE05 | 1980                  |
| tropicamide                             | DB00809          | molecular entity  | organic               | Nature-inspired | S01FA56; S01FA06                                              | 1960                  |
| tuberculin, purified protein derivative | DB11601          | others            | diagnostics           |                 |                                                               |                       |
| typhoid vaccine                         |                  | biological entity | proteins              |                 | J07AP                                                         |                       |
| ulipristal acetate                      | DB08867          | molecular entity  | organic               | Nature-inspired | G03XB02; G03AD02                                              | 2010                  |
| urea                                    | DB03904          | molecular entity  | organic               | natural         | B05BC02; D02AE01; D02AE51                                     | 1995                  |
| vaborbactam                             | DB12107          | molecular entity  | organic               | de novo         | J01DH52                                                       | 2017                  |
| valganciclovir                          | DB01610          | molecular entity  | organic               | Nature-inspired | J05AB14                                                       | 2001                  |
| valproic acid                           | DB00313          | molecular entity  | organic               | de novo         | N03AG01                                                       | 1978                  |
| vancomycin                              | DB00512          | molecular entity  | organic               | natural         | A07AA09; J01XA01                                              | 1964                  |
| varicella vaccine                       |                  | biological entity | proteins              |                 | J07BK                                                         |                       |
| vecuronium                              | DB01339          | molecular entity  | organic               | Nature-inspired | M03AC03                                                       | 1984                  |
| velpatasvir                             | DB11613          | molecular entity  | organic               | de novo         | J05AX69                                                       | 2016                  |
| verapamil                               | DB00661          | molecular entity  | organic               | de novo         | C08DA51; C08DA01; C09BB10                                     | 1981                  |
| vinblastine                             | DB00570          | molecular entity  | organic               | natural         | L01CA01                                                       | 1965                  |
| vincristine                             | DB00541          | molecular entity  | organic               | natural         | L01CA02                                                       | 1963                  |
| vinorelbine                             | DB00361          | molecular entity  | organic               | Nature-inspired | L01CA04                                                       | 1994                  |
| voriconazole                            | DB00582          | molecular entity  | organic               | de novo         | J02AC03                                                       | 2002                  |
| warfarin                                | DB00682          | molecular entity  | organic               | natural         | B01AA03                                                       | 1954                  |
| water for injection                     |                  | others            | solutions             |                 |                                                               |                       |
| whole blood                             |                  | others            | blood and derivatives |                 |                                                               |                       |
| xylometazoline                          | DB06694          | molecular entity  | organic               | de novo         | S01GA53; R01AA07; R01AB06; S01GA03                            | 1959                  |
| yellow fever vaccine                    |                  | biological entity | proteins              |                 | J07BL01                                                       |                       |
| zidovudine                              | DB00495          | molecular entity  | organic               | Nature-inspired | J05AR04; J05AF01; J05AR01; J05AR05                            | 1987                  |

| EM NAME         | DRUGBANK<br>ID CODE | CLASSIFICATION   |           |         | ATC CODE/S       | FDA year of<br>approval* |
|-----------------|---------------------|------------------|-----------|---------|------------------|--------------------------|
|                 |                     | LEVEL A          | LEVEL B   | LEVEL C |                  |                          |
| zinc sulfate    | DB09322             | molecular entity | inorganic |         | A12CB01          |                          |
| zoledronic acid | DB00399             | molecular entity | organic   | de novo | M05BA08; M05BB08 | 2001                     |

\* extracted (when available) for organic drugs only.

## **References:**

1. Wishart, D. S.; Knox, C.; Guo, A. C.; Shrivastava, S.; Hassanali, M.; Stothard, P.; Chang, Z.; Woolsey, J. Drugbank: a comprehensive resource for in silico drug discovery and exploration. *Nucleic Acids Res.* **2006**, *34*, D668-D672.
2. <http://www.chemspider.com/> (accessed Mar 5 , 2020).
